# Supplementary material for: A {110} facet predominated Bi6O6(OH)3(NO3)3·1.5H2O photocatalyst: selective hydrothermal synthesis and its superior photocatalytic activity for degradation of phenol
Source: Royal Society of Chemistry journal article supplement (doi:10.1039/c5ra15629g), 2015-01-01
Supplement: c5ra15629g1.pdf [file c5ra15629g1.pdf]

## Electronic Supporting Information (ESI)

**{110} facets predominated  $\text{Bi}_6\text{O}_6(\text{OH})_3(\text{NO}_3)_3 \cdot 1.5\text{H}_2\text{O}$  photocatalyst: selectively hydrothermal synthesis and superior photocatalytic activity for degradation of phenol**

**Li-Min Yang, Guo-Ying Zhang\*, Yue Liu\*, Yan-Yan Xu, Chun-Mei Liu and Jing-Wang Liu**

*Tianjin Key Laboratory of Structure and Performance for Functional Molecules; Key Laboratory of Inorganic-Organic Hybrid Functional Material Chemistry, Ministry of Education; College of Chemistry, Tianjin Normal University, Tianjin 300387, China*

\*Corresponding author. E-mail: [hxyzyg@mail.tjnu.edu.cn](mailto:hxyzyg@mail.tjnu.edu.cn) Fax: +86 22 23766532

**Table S1 The hydrothermal samples prepared at variable temperatures and times.**

| <b>Sample</b>      | 1      | 2      | 3      | 4      | 5      | 6      | 7     | 8      | 9      | 10     |
|--------------------|--------|--------|--------|--------|--------|--------|-------|--------|--------|--------|
| <b>Temperature</b> | 120 °C | 80 °C | 100 °C | 160 °C | 200 °C |
| <b>Time</b>        | 0 min  | 30 min | 50 min | 2 h    | 8 h    | 12 h   | 8 h   | 8 h    | 8 h    | 8 h    |

Table S2 Regression equations and correlation coefficient R for different intermediate substances.

| <b>substance</b> | <b>Regression equation</b> | <b>R</b> |
|------------------|----------------------------|----------|
| catechol         | $y=1803.43x+0.032$         | 0.9996   |
| hydroquinone     | $y=3582.4x+0.025$          | 0.9999   |
| resorcinol       | $y=3737.14x+0.038$         | 0.9977   |

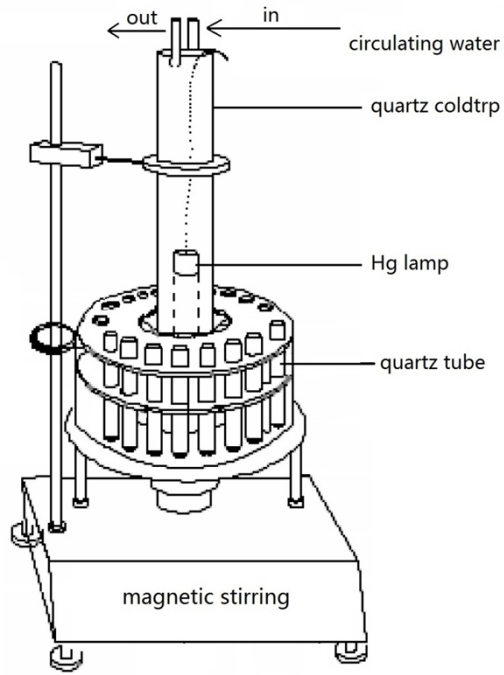

Figure S1 the schematic illustration of the photoreactor.

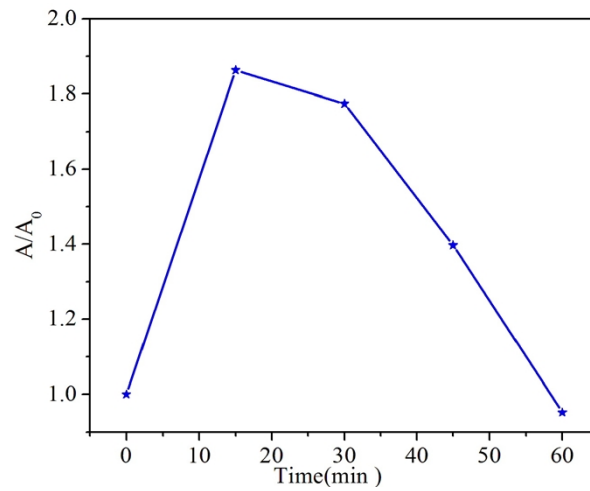

Figure S2 Direct photolysis of phenol under UV-light irradiation

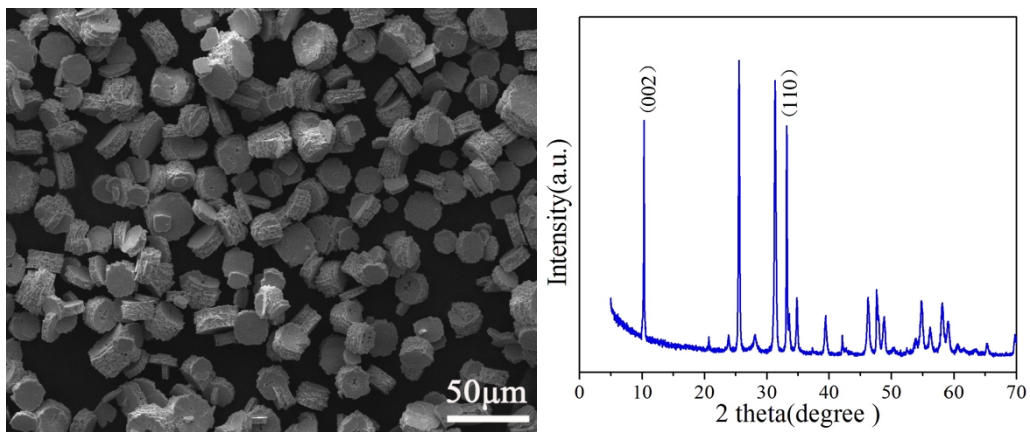

Figure S3 SEM images and corresponding XRD pattern of BBN-12h.

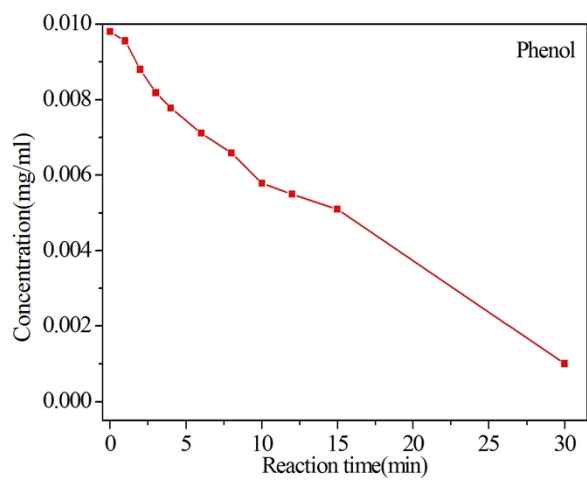

Figure S4 concentrations of phenol during the photocatalysis.
